# Supplementary material
Source: Springer Nature journal article supplement (https://www.springermedizin.de/resource/supplementary/13030_2012_117_MOESM2_ESM.pdf/9644778)

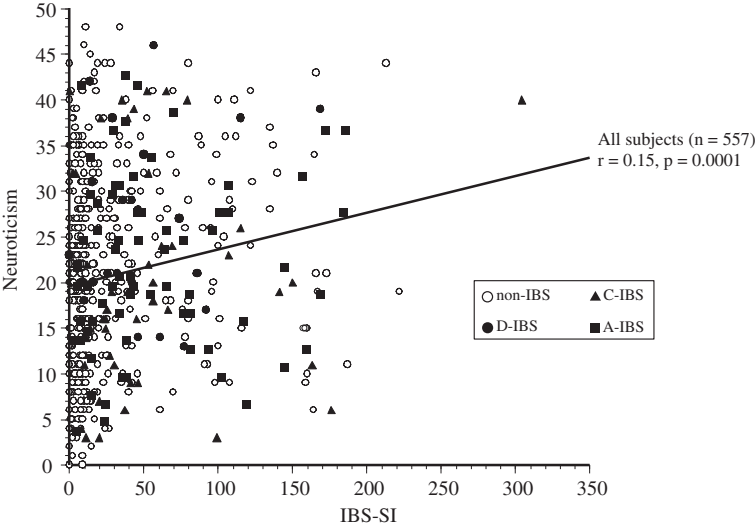

Supplement: MOESM2 [file 9644778]
